# Supplementary material for: Polyamine Induction in Postharvest Banana Fruits in Response to NO Donor SNP Occurs via l-Arginine Mediated Pathway and Not via Competitive Diversion of S-Adenosyl-l-Methionine
Source: MDPI journal article supplement (doi:10.3390/antiox8090358), 2019-09-01
Supplement: s1 [file s1]

## Supplementary Materials:

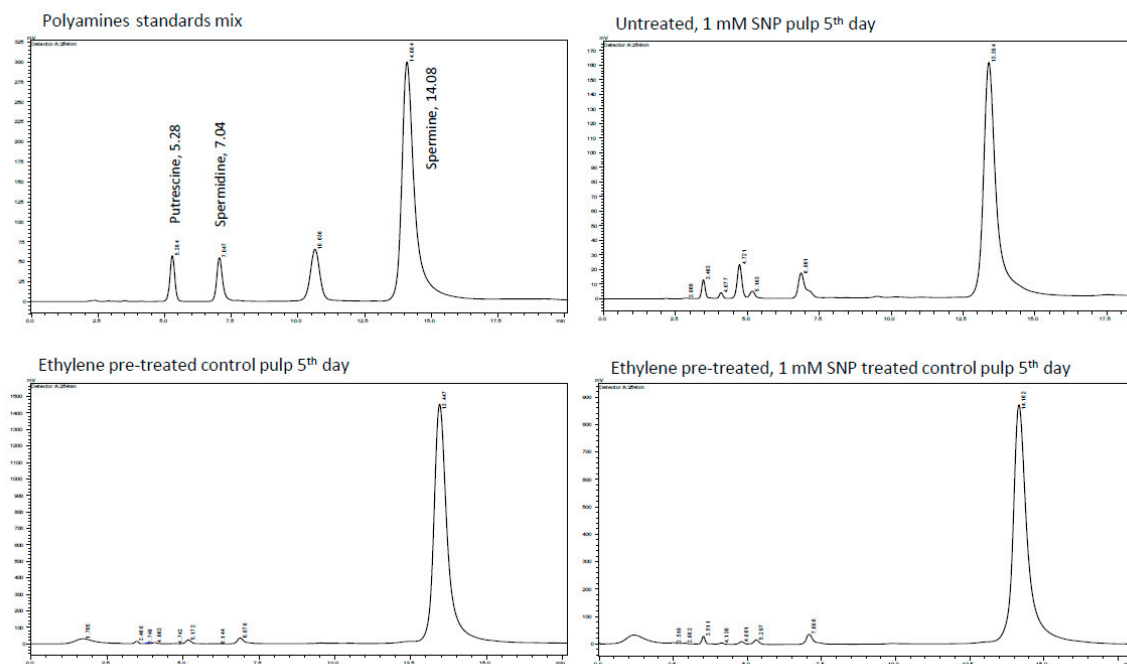

**Figure S1.** Representative chromatograms of polyamine HPLC profiles of standard mix and treated banana pulp extracts. The peaks for putrescine, spermidine and spermine were observed at 5.28, 7.04 and 14.08 minutes respectively in standard mix in an isocratic mode of elution consisting of MeOH/H<sub>2</sub>O (64:36). Standards were of 2.5 mg mL<sup>-1</sup> concentration and 5 µL each of standard was mixed and used for analysis.

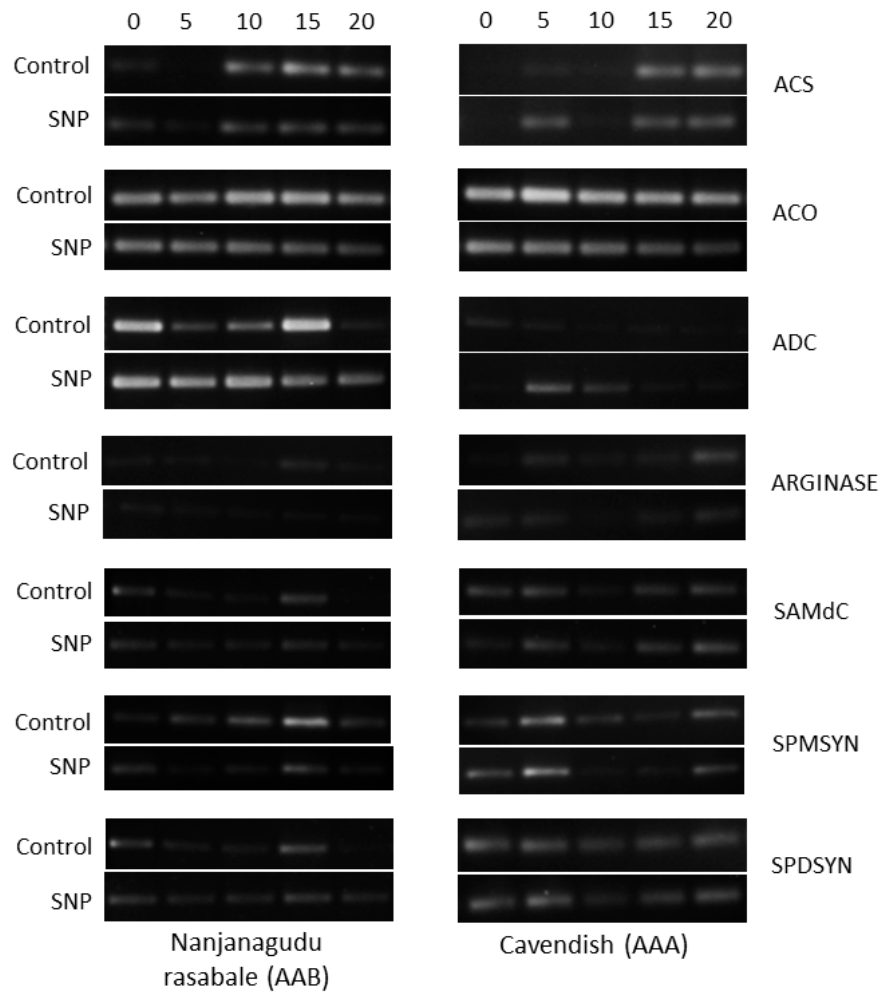

**Figure S2.** Relative expression of ethylene pathway (*ACS* and *ACO*) and polyamine pathway (*Arginase*, *ADC*, *SPDSYN*, *SPMSYN*, and *SAMdc*) as determined by semi-quantitative RT-PCR in SNP treated fruits of Nanjanagudu rasabale (NR, AAB genome) and Cavendish (CAV, AAA genome) banana fruits.

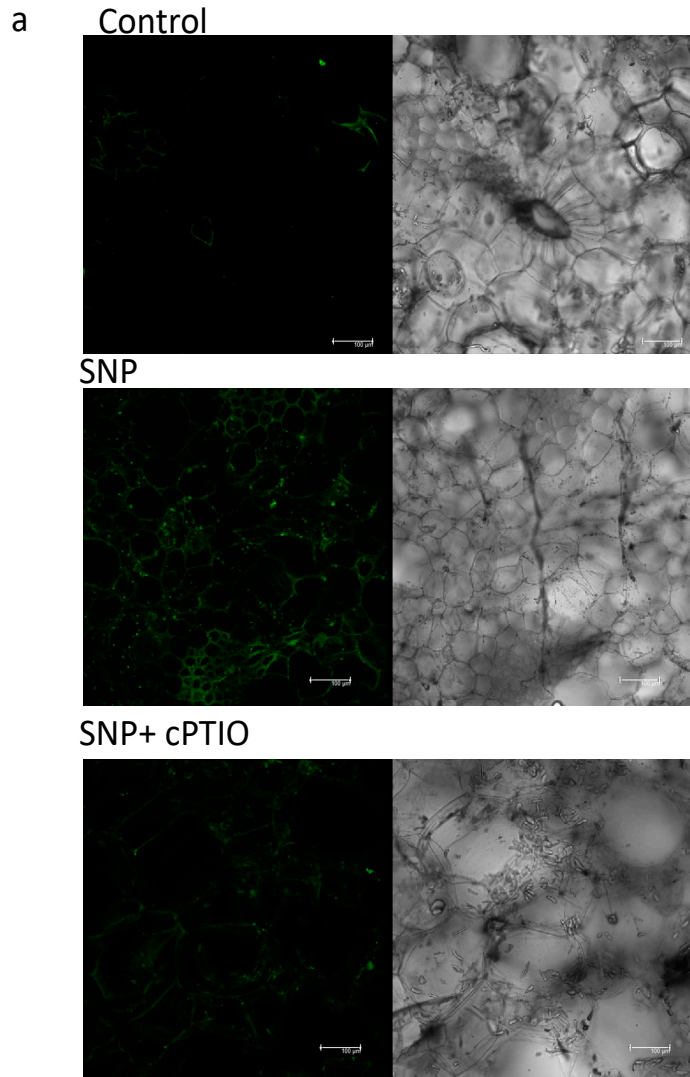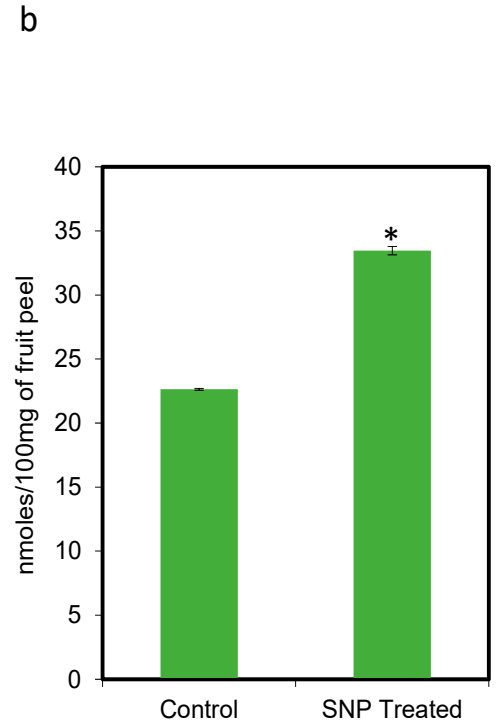

**Figure S3.** Nitric oxide DAF-FMDA fluorescence in Banana peels in response to SNP treatment. 200  $\mu$ M cPTIO was used as control. Image is a representative of 3 independent replicates. B. Nitrite levels in response to SNP treatment. T test was performed and significant difference was  $p < 0.005$ .

**Table S1.** Oligonucleotide primers used for expression studies of polyamine pathway and ethylene pathway genes.

| Sl. No.                 | Gene                                             | Primer name and sequence                                                 | Amplicon (bp) | Accession No.  |
|-------------------------|--------------------------------------------------|--------------------------------------------------------------------------|---------------|----------------|
| Polyamine pathway genes |                                                  |                                                                          |               |                |
| 1                       | S-adenosyl methionine decarboxylase (SAMdC)      | SAMdCF – CAACCATCTCCACATCGTAG<br>SAMdCR1 - TGCCCTCTCAGTATTCAGC           | 207           | XM_009411923.2 |
| 2                       | Spermine synthase (SPMSYN)                       | SPMSYN261F1 –<br>GTGCCATGAGACGGTGGTGTC<br>SPMSYNR - GCAATCATCTCTTGGTAGGC | 257           | XM_018830840.1 |
| 3                       | Spermidine synthase (SPDSYN)                     | SPDF1 – GGAGGCGGTGATGGTGGTGT<br>SPDR1 - GTCCAAGCATAAYTCACAGAG            | 413           | XM_009414039   |
| 4                       | Arginase                                         | ARGNS158F – GACCACTCCATATCATTCCAG<br>ARGNS158R - CCTCCCTCCATTATTCGTGC    | 158           | XM_009402527   |
| 5                       | Arginine decarboxylase (ADC)                     | ADC296F – GTGGAGGACATCATGGAGTT<br>ACD296R – TGCTTGGTGCGGAGCTTGGC         | 296           | XM_009420048   |
| Ethylene pathway genes  |                                                  |                                                                          |               |                |
| 6                       | 1-aminocyclopropane carboxylate synthase (ACS)   | NRACS-140F-CGTCAACGAGAAAAGGATG<br>NRACS-140R-TGTAGGCGATGTGAATCAG         | 140           | AF056163.1     |
| 7                       | 1-aminocyclopropane carboxylate oxidase (ACO)    | NRACO-164F-TCGGATAGACCTCCTTCTTC<br>NRACO-164R-CACCAATGGCAAGTACAAG        | 164           | EF463066       |
| Reference gene          |                                                  |                                                                          |               |                |
| 8                       | Glyceraldehyde-3-phosphate dehydrogenase (GAPDH) | GAPDH-168F-TCACAGCCACTCAAAAGACTG<br>GAPDH-168R-TCGGAACACGGAAAGACATAC     | 168           | AY821550.1     |

**Table S2.** Effect of SNP treatment on color parameters during banana fruit ripening.

| Treatment                                                                                                                                                                                                                                                                                                                                                                                                                                                     | Color (Lightness#)     |                |                |                |                |
|---------------------------------------------------------------------------------------------------------------------------------------------------------------------------------------------------------------------------------------------------------------------------------------------------------------------------------------------------------------------------------------------------------------------------------------------------------------|------------------------|----------------|----------------|----------------|----------------|
|                                                                                                                                                                                                                                                                                                                                                                                                                                                               | Day 0                  | Day 5          | Day 10         | Day 15         | Day 20         |
| Control                                                                                                                                                                                                                                                                                                                                                                                                                                                       | 66.2 ± 3.28cd          | 68.54 ± 4.52bc | 72.32 ± 5.46ab | 69.52 ± 4.68bc | 62.54 ± 2.82e  |
| SNP 1 mM                                                                                                                                                                                                                                                                                                                                                                                                                                                      | 64.52 ± 4.92de         | 66.62 ± 2.48cd | 74.22 ± 3.16a  | 76.28 ± 4.88a  | 68.28 ± 4.22bc |
| Values are represented as Mean ± SE of six replicates. Significance was tested by Duncan Multiple Range Test at $p < 0.05$ , and values with same superscript were found not significantly different from each other. #Lightness (L): A measure of the level of light or dark (ranges from black with a value of zero at the bottom of the axis to white with a value of 100 at the top of the axis).                                                         |                        |                |                |                |                |
| Treatment                                                                                                                                                                                                                                                                                                                                                                                                                                                     | Color of peel (Chroma) |                |                |                |                |
|                                                                                                                                                                                                                                                                                                                                                                                                                                                               | Day 0                  | Day 5          | Day 10         | Day 15         | Day 20         |
| Control                                                                                                                                                                                                                                                                                                                                                                                                                                                       | 19.56 ± 2.42c          | 32.48 ± 5.82b  | 38.92 ± 4.16a  | 37.28 ± 4.28a  | 35.26 ± 3.84ab |
| SNP 1 mM                                                                                                                                                                                                                                                                                                                                                                                                                                                      | 18.28 ± 1.92c          | 21.68 ± 3.46c  | 35.28 ± 3.64ab | 38.22 ± 1.68a  | 36.52 ± 1.08a  |
| Values are represented as Mean ± SE of six replicates. Significance was tested by Duncan Multiple Range Test at $p < 0.05$ , and values with same superscript were found not significantly different from each other. <sup>s</sup> Chroma: A measure ranging from -150 to 150 increasing outward from the lightness axis; calculated as $(a^2 + b^2)^{0.5}$ .                                                                                                 |                        |                |                |                |                |
| Treatment                                                                                                                                                                                                                                                                                                                                                                                                                                                     | Color of peel (Hue)    |                |                |                |                |
|                                                                                                                                                                                                                                                                                                                                                                                                                                                               | Day 0                  | Day 5          | Day 10         | Day 15         | Day 20         |
| Control                                                                                                                                                                                                                                                                                                                                                                                                                                                       | -0.86 ± 0.1b           | -0.96 ± 0.1b   | -1.24 ± 0.3c   | -1.62 ± 0.2d   | 1.92 ± 0.3a    |
| SNP 1 mM                                                                                                                                                                                                                                                                                                                                                                                                                                                      | -0.81 ± 0.1b           | -0.84 ± 0.1b   | -0.94 ± 0.2b   | -1.36 ± 0.2c   | 1.78 ± 0.2a    |
| Values are represented as Mean ± SE of six replicates. Significance was tested by Duncan Multiple Range Test at $p < 0.05$ , and values with same superscript were found not significantly different from each other. *Hue: A measure ranging from 010° to 360° as arranged on pages on the color coordinate axis; calculated as $\tan^{-1} (b/a)$ . Hue angle values: 0°, 90°, 180° and 270° corresponds to red, yellow, green and blue colors respectively. |                        |                |                |                |                |
